# Supplementary material for: Time-dependent and Pb-dependent antagonism and synergism towardsVibrio qinghaiensissp.-Q67 within heavy metal mixtures
Source: Royal Society of Chemistry journal article supplement (doi:10.1039/c8ra04191a), 2018-01-01
Supplement: c8ra04191a1.pdf [file c8ra04191a1.pdf]

## Appendix A: Supplementary Information

### ***Time-dependent and Pb-dependent antagonism and synergism towards *Vibrio qinghaiensis* sp.-Q67 within heavy metal mixtures***

Jin Zhang<sup>a,b,\*</sup>, Ting-Ting Ding<sup>a</sup>, Xin-Qin Dong<sup>a</sup> and Zhi-Qiang Bian<sup>a</sup>

<sup>a</sup> Key Laboratory of Water Pollution Control and Wastewater Resource of Anhui province, College of Environment and Energy Engineering, Anhui Jianzhu University, Hefei 230601, PR China

<sup>b</sup> Beijing Key Laboratory for Emerging Organic Contaminants Control, Tsinghua University, Beijing 100084, China

---

\* Corresponding author: A/Prof. Jin Zhang

College of Environment and Energy Engineering, Anhui Jianzhu University

292 Ziyun Road, Hefei 230601, P. R. China

Tell: (86)-180-1958-0589

E-mail address: ginnzy@163.com (J. Zhang)

## **Contents**

(Five Tables and four Figures)

Table S1

Table S2a

Table S2b

Table S2c

Table S3

Table S4a

Table S4b

Table S4c

Table S5

Fig. S1

Fig. S2

Fig. S3

Fig. S4a

Fig. S4b

**Table S1** The model parameters ( $\alpha$  and  $\beta$ ), some statistics ( $RMSE$  and  $R$ ), and median effective concentration ( $EC_{50}$ ) of the three heavy metals in five time points

|    | Time/h | $F^a$ | $\alpha$ | $\beta$ | $RMSE$ | $R$    | $EC_{50}$ | $pEC_{50}^b$ |
|----|--------|-------|----------|---------|--------|--------|-----------|--------------|
| Pb | 0.25   | L     | 5.46     | 1.67    | 0.067  | 0.9563 | 6.06E-04  | 3.22         |
|    | 2      | L     | 6.36     | 2.13    | 0.064  | 0.9695 | 1.11E-03  | 2.96         |
|    | 4      | L     | 7.44     | 2.39    | 0.058  | 0.9790 | 8.61E-04  | 3.07         |
|    | 8      | W     | 5.44     | 1.79    | 0.051  | 0.9858 | 5.70E-04  | 3.24         |
|    | 12     | W     | 5.55     | 1.85    | 0.052  | 0.9852 | 6.34E-04  | 3.19         |
| Cd | 0.25   | W     | 16.98    | 4.65    | 0.043  | 0.9935 | 1.82E-04  | 3.74         |
|    | 2      | W     | 16.91    | 4.67    | 0.016  | 0.9990 | 1.94E-04  | 3.71         |
|    | 4      | W     | 11.94    | 3.22    | 0.043  | 0.9922 | 1.43E-04  | 3.85         |
|    | 8      | W     | 11.65    | 3.05    | 0.049  | 0.9954 | 1.06E-04  | 3.98         |
|    | 12     | W     | 15.91    | 4.08    | 0.021  | 0.9938 | 1.00E-04  | 4.00         |
| Mn | 0.25   | L     | 8.14     | 3.19    | 0.086  | 0.9552 | 2.81E-03  | 2.55         |
|    | 2      | L     | 10.69    | 3.93    | 0.071  | 0.9771 | 1.91E-03  | 2.72         |
|    | 4      | W     | 8.83     | 3.33    | 0.084  | 0.9748 | 1.67E-03  | 2.78         |
|    | 8      | W     | 6.34     | 2.35    | 0.060  | 0.9837 | 1.31E-03  | 2.88         |
|    | 12     | W     | 5.18     | 1.79    | 0.041  | 0.9904 | 7.28E-04  | 3.14         |

<sup>a</sup>  $F$ : fitted functions where L refers to logit function and W to Weibull function, <sup>b</sup>  $pEC_{50}$ :  $-\log EC_{50}$ .

**Table S2a** The model parameters ( $\alpha$  and  $\beta$ ), some statistics ( $RMSE$  and  $R$ ), and median effective concentration ( $EC_{50}$ ) of the binary mixture rays of Cd and Pb in five time points

| Ray      | Time/h | $F$ | $\alpha$ | $\beta$ | $RMSE$ | $R$    | $EC_{50}$ | $pEC_{50}$ |
|----------|--------|-----|----------|---------|--------|--------|-----------|------------|
| Cd-Pb-R1 | 0.25   | L   | 8.85     | 2.61    | 0.044  | 0.9860 | 4.07E-04  | 3.391      |
|          | 2      | L   | 7.92     | 2.38    | 0.027  | 0.9933 | 4.70E-04  | 3.328      |
|          | 4      | L   | 7.3      | 2.01    | 0.021  | 0.9962 | 2.33E-04  | 3.632      |
|          | 8      | L   | 6.9      | 1.83    | 0.016  | 0.9975 | 1.70E-04  | 3.770      |
|          | 12     | L   | 7.04     | 1.79    | 0.023  | 0.9950 | 1.17E-04  | 3.933      |
| Cd-Pb-R2 | 0.25   | L   | 7.08     | 2.15    | 0.056  | 0.9738 | 5.09E-04  | 3.293      |
|          | 2      | L   | 6.35     | 2.01    | 0.043  | 0.9801 | 6.93E-04  | 3.159      |
|          | 4      | L   | 7.49     | 2.1     | 0.052  | 0.9790 | 2.71E-04  | 3.567      |
|          | 8      | L   | 6.19     | 1.77    | 0.039  | 0.9843 | 3.18E-04  | 3.497      |
|          | 12     | L   | 6.22     | 1.81    | 0.025  | 0.9932 | 3.66E-04  | 3.436      |
| Cd-Pb-R3 | 0.25   | L   | 7.08     | 2.15    | 0.056  | 0.9738 | 5.09E-04  | 3.293      |
|          | 2      | L   | 5.39     | 1.81    | 0.056  | 0.9606 | 1.05E-03  | 2.978      |
|          | 4      | L   | 7.14     | 2.14    | 0.055  | 0.9754 | 4.61E-04  | 3.336      |
|          | 8      | L   | 5.29     | 1.72    | 0.041  | 0.9773 | 8.40E-04  | 3.076      |
|          | 12     | L   | 5.62     | 1.93    | 0.041  | 0.9754 | 1.22E-03  | 2.912      |
| Cd-Pb-R4 | 0.25   | L   | 5.45     | 1.70    | 0.074  | 0.9443 | 6.22E-04  | 3.206      |
|          | 2      | L   | 4.15     | 1.44    | 0.042  | 0.9691 | 1.31E-03  | 2.882      |
|          | 4      | L   | 6.38     | 1.98    | 0.052  | 0.9746 | 5.99E-04  | 3.222      |
|          | 8      | L   | 4.17     | 1.51    | 0.036  | 0.9729 | 1.73E-03  | 2.762      |
|          | 12     | L   | 3.23     | 1.27    | 0.036  | 0.9586 | 2.86E-03  | 2.543      |
| Cd-Pb-R5 | 0.25   | L   | 5.79     | 1.76    | 0.077  | 0.9460 | 5.13E-04  | 3.290      |
|          | 2      | L   | 4.78     | 1.49    | 0.067  | 0.9438 | 6.19E-04  | 3.208      |
|          | 4      | L   | 6.54     | 2.02    | 0.040  | 0.9859 | 5.79E-04  | 3.238      |
|          | 8      | L   | 4.19     | 1.58    | 0.032  | 0.9780 | 2.23E-03  | 2.652      |
|          | 12     | L   | 4.90     | 1.73    | 0.032  | 0.9833 | 1.47E-03  | 2.832      |

**Table S2b** The model parameters ( $\alpha$  and  $\beta$ ), some statistics ( $RMSE$  and  $R$ ), and median effective concentration ( $EC_{50}$ ) of the binary mixture rays of Cd and Mn in five time points

| Ray      | Time/h | $F$ | $\alpha$ | $\beta$ | $RMSE$ | $R$    | $EC_{50}$ | $pEC_{50}$ |
|----------|--------|-----|----------|---------|--------|--------|-----------|------------|
| Cd-Mn-R1 | 0.25   | L   | 14.98    | 4.50    | 0.063  | 0.9791 | 4.69E-04  | 3.329      |
|          | 2      | W   | 14.98    | 4.47    | 0.067  | 0.9852 | 3.63E-04  | 3.440      |
|          | 4      | W   | 9.75     | 2.81    | 0.046  | 0.9914 | 2.33E-04  | 3.633      |
|          | 8      | W   | 8.43     | 2.39    | 0.045  | 0.9908 | 1.92E-04  | 3.718      |
|          | 12     | W   | 6.13     | 1.60    | 0.030  | 0.9941 | 7.92E-05  | 4.101      |
| Cd-Mn-R2 | 0.25   | W   | 8.62     | 2.88    | 0.035  | 0.9929 | 7.11E-04  | 3.148      |
|          | 2      | L   | 15.00    | 4.47    | 0.047  | 0.9941 | 4.41E-04  | 3.356      |
|          | 4      | L   | 13.94    | 3.97    | 0.042  | 0.9939 | 3.08E-04  | 3.511      |
|          | 8      | L   | 13.68    | 3.83    | 0.044  | 0.9924 | 2.68E-04  | 3.572      |
|          | 12     | L   | 9.17     | 2.26    | 0.034  | 0.9911 | 8.76E-05  | 4.058      |
| Cd-Mn-R3 | 0.25   | L   | 13.09    | 4.30    | 0.027  | 0.9973 | 9.03E-04  | 3.044      |
|          | 2      | L   | 15.00    | 4.63    | 0.077  | 0.9887 | 5.76E-04  | 3.240      |
|          | 4      | L   | 15.00    | 4.37    | 0.064  | 0.9891 | 3.69E-04  | 3.432      |
|          | 8      | L   | 15.00    | 4.38    | 0.024  | 0.9979 | 3.76E-04  | 3.425      |
|          | 12     | L   | 12.36    | 3.34    | 0.024  | 0.9973 | 1.99E-04  | 3.701      |
| Cd-Mn-R4 | 0.25   | L   | 13.41    | 4.52    | 0.029  | 0.9970 | 1.08E-03  | 2.967      |
|          | 2      | L   | 12.62    | 4.11    | 0.047  | 0.9912 | 8.50E-04  | 3.071      |
|          | 4      | L   | 12.10    | 3.71    | 0.048  | 0.9905 | 5.48E-04  | 3.261      |
|          | 8      | L   | 14.99    | 4.48    | 0.056  | 0.9905 | 4.51E-04  | 3.346      |
|          | 12     | W   | 6.76     | 1.96    | 0.033  | 0.9933 | 2.13E-04  | 3.671      |
| Cd-Mn-R5 | 0.25   | L   | 13.73    | 4.75    | 0.054  | 0.9904 | 1.29E-03  | 2.891      |
|          | 2      | W   | 12.56    | 4.26    | 0.084  | 0.9868 | 9.11E-04  | 3.041      |
|          | 4      | W   | 7.80     | 2.54    | 0.080  | 0.9747 | 5.76E-04  | 3.240      |
|          | 8      | W   | 12.63    | 4.13    | 0.076  | 0.9873 | 6.95E-04  | 3.158      |
|          | 12     | W   | 9.17     | 2.85    | 0.018  | 0.9987 | 4.21E-04  | 3.376      |

**Table S2c** The model parameters ( $\alpha$  and  $\beta$ ), some statistics ( $RMSE$  and  $R$ ), and median effective concentration ( $EC_{50}$ ) of the binary mixture rays of Pb and Mn in five time points

| Ray      | Time/h | $F$ | $\alpha$ | $\beta$ | $RMSE$ | $R$    | $EC_{50}$ | $pEC_{50}$ |
|----------|--------|-----|----------|---------|--------|--------|-----------|------------|
| Pb-Mn-R1 | 0.25   | L   | 5.42     | 1.65    | 0.090  | 0.9249 | 5.19E-04  | 3.285      |
|          | 2      | L   | 4.51     | 1.49    | 0.057  | 0.9560 | 9.40E-04  | 3.027      |
|          | 4      | L   | 6.40     | 2.05    | 0.027  | 0.9937 | 7.55E-04  | 3.122      |
|          | 8      | W   | 3.03     | 1.24    | 0.034  | 0.9750 | 1.91E-03  | 2.719      |
|          | 12     | W   | 2.64     | 1.06    | 0.080  | 0.8772 | 1.53E-03  | 2.816      |
| Pb-Mn-R2 | 0.25   | L   | 4.14     | 1.26    | 0.110  | 0.8397 | 5.18E-04  | 3.286      |
|          | 2      | L   | 4.84     | 1.57    | 0.059  | 0.9595 | 8.26E-04  | 3.083      |
|          | 4      | L   | 6.72     | 2.02    | 0.070  | 0.9648 | 4.71E-04  | 3.327      |
|          | 8      | L   | 5.19     | 1.51    | 0.061  | 0.9574 | 3.66E-04  | 3.437      |
|          | 12     | W   | 2.97     | 0.90    | 0.062  | 0.9444 | 1.79E-04  | 3.746      |
| Pb-Mn-R3 | 0.25   | L   | 4.29     | 1.34    | 0.103  | 0.8677 | 6.29E-04  | 3.201      |
|          | 2      | L   | 5.58     | 1.79    | 0.064  | 0.9627 | 7.63E-04  | 3.117      |
|          | 4      | L   | 7.01     | 2.16    | 0.059  | 0.9745 | 5.68E-04  | 3.245      |
|          | 8      | L   | 5.83     | 1.76    | 0.064  | 0.9623 | 4.87E-04  | 3.313      |
|          | 12     | W   | 2.89     | 0.90    | 0.057  | 0.9517 | 2.16E-04  | 3.664      |
| Pb-Mn-R4 | 0.25   | L   | 4.72     | 1.53    | 0.084  | 0.9225 | 8.22E-04  | 3.085      |
|          | 2      | L   | 5.66     | 1.84    | 0.034  | 0.9884 | 8.39E-04  | 3.076      |
|          | 4      | L   | 7.16     | 2.19    | 0.053  | 0.9800 | 5.38E-04  | 3.269      |
|          | 8      | W   | 4.12     | 1.39    | 0.074  | 0.9554 | 5.41E-04  | 3.267      |
|          | 12     | W   | 3.21     | 1.02    | 0.068  | 0.9456 | 2.79E-04  | 3.555      |
| Pb-Mn-R5 | 0.25   | L   | 4.90     | 1.70    | 0.091  | 0.9223 | 1.31E-03  | 2.882      |
|          | 2      | L   | 5.57     | 1.93    | 0.055  | 0.9731 | 1.31E-03  | 2.882      |
|          | 4      | L   | 7.57     | 2.62    | 0.069  | 0.9688 | 1.29E-03  | 2.889      |
|          | 8      | W   | 4.31     | 1.58    | 0.064  | 0.9690 | 1.00E-03  | 3.000      |
|          | 12     | L   | 6.62     | 1.94    | 0.073  | 0.9558 | 3.87E-04  | 3.412      |

**Table S3** The model parameters ( $\alpha$  and  $\beta$ ), some statistics ( $RMSE$  and  $R$ ), and median effective concentration ( $EC_{50}$ ) of the ternary mixture rays of Pb, Cd and Mn in five time points.

| Ray         | Time/h | $F$ | $\alpha$ | $\beta$ | $RMSE$ | $R$    | $EC_{50}$ | $pEC_{50}$ |
|-------------|--------|-----|----------|---------|--------|--------|-----------|------------|
| Pb-Cd-Mn-R1 | 0.25   | L   | 13.59    | 4.44    | 0.036  | 0.9942 | 8.69E-04  | 3.061      |
|             | 2      | L   | 14.03    | 4.51    | 0.036  | 0.9948 | 7.74E-04  | 3.111      |
|             | 4      | L   | 14.99    | 4.50    | 0.048  | 0.9921 | 4.66E-04  | 3.331      |
|             | 8      | L   | 10.56    | 3.03    | 0.057  | 0.9854 | 3.27E-04  | 3.485      |
|             | 12     | L   | 9.98     | 2.80    | 0.060  | 0.9825 | 2.73E-04  | 3.564      |
| Pb-Cd-Mn-R2 | 0.25   | L   | 15.00    | 4.71    | 0.052  | 0.9892 | 6.54E-04  | 3.185      |
|             | 2      | L   | 15.00    | 4.73    | 0.043  | 0.9942 | 6.74E-04  | 3.171      |
|             | 4      | L   | 13.88    | 4.08    | 0.062  | 0.9872 | 3.96E-04  | 3.402      |
|             | 8      | L   | 8.91     | 2.42    | 0.686  | 0.9735 | 2.08E-04  | 3.682      |
|             | 12     | L   | 9.47     | 2.53    | 0.061  | 0.9803 | 1.81E-04  | 3.743      |
| Pb-Cd-Mn-R3 | 0.25   | L   | 5.73     | 1.84    | 0.074  | 0.9544 | 7.67E-04  | 3.114      |
|             | 2      | L   | 7.53     | 2.38    | 0.038  | 0.9909 | 6.86E-04  | 3.164      |
|             | 4      | L   | 8.49     | 2.61    | 0.054  | 0.9842 | 5.58E-04  | 3.253      |
|             | 8      | L   | 6.38     | 1.91    | 0.072  | 0.9590 | 4.56E-04  | 3.340      |
|             | 12     | L   | 6.22     | 1.78    | 0.071  | 0.9561 | 3.20E-04  | 3.494      |
| Pb-Cd-Mn-R4 | 0.25   | L   | 5.60     | 1.67    | 0.065  | 0.9583 | 4.43E-04  | 3.353      |
|             | 2      | L   | 5.91     | 1.86    | 0.041  | 0.9838 | 6.64E-04  | 3.177      |
|             | 4      | L   | 6.43     | 1.92    | 0.043  | 0.9837 | 4.47E-04  | 3.349      |
|             | 8      | L   | 5.89     | 1.69    | 0.035  | 0.9874 | 3.27E-04  | 3.485      |
|             | 12     | L   | 5.48     | 1.46    | 0.028  | 0.9897 | 1.76E-04  | 3.753      |
| Pb-Cd-Mn-R5 | 0.25   | L   | 7.01     | 2.19    | 0.054  | 0.9795 | 6.29E-04  | 3.200      |
|             | 2      | L   | 8.33     | 2.65    | 0.024  | 0.9962 | 7.18E-04  | 3.143      |
|             | 4      | L   | 8.20     | 2.51    | 0.045  | 0.9876 | 5.41E-04  | 3.267      |
|             | 8      | L   | 6.70     | 1.98    | 0.049  | 0.9804 | 4.13E-04  | 3.384      |
|             | 12     | L   | 5.75     | 1.54    | 0.048  | 0.9727 | 1.84E-04  | 7.734      |

**Table S4a** The concentration of a single component in the mixture of Cd-Pb

| Rays     | components | C <sub>1</sub> <sup>c</sup> | C <sub>2</sub> | C <sub>3</sub> | C <sub>4</sub> | C <sub>5</sub> | C <sub>6</sub> | C <sub>7</sub> | C <sub>8</sub> | C <sub>9</sub> | C <sub>10</sub> | C <sub>11</sub> | C <sub>12</sub> |
|----------|------------|-----------------------------|----------------|----------------|----------------|----------------|----------------|----------------|----------------|----------------|-----------------|-----------------|-----------------|
| Cd-Pb-R1 | Cd         | 4.622E-04                   | 3.143E-04      | 2.137E-04      | 1.453E-04      | 9.883E-05      | 6.720E-05      | 4.570E-05      | 3.107E-05      | 2.113E-05      | 1.437E-05       | 9.771E-06       | 6.644E-06       |
|          | Pb         | 5.859E-04                   | 3.984E-04      | 2.709E-04      | 1.842E-04      | 1.253E-04      | 8.518E-05      | 5.793E-05      | 3.939E-05      | 2.678E-05      | 1.821E-05       | 1.239E-05       | 8.422E-06       |
| Cd-Pb-R2 | Cd         | 3.431E-04                   | 2.333E-04      | 1.586E-04      | 1.079E-04      | 7.335E-05      | 4.988E-05      | 3.392E-05      | 2.306E-05      | 1.568E-05      | 1.067E-05       | 7.252E-06       | 4.932E-06       |
|          | Pb         | 1.088E-03                   | 7.400E-04      | 5.032E-04      | 3.422E-04      | 2.327E-04      | 1.582E-04      | 1.076E-04      | 7.317E-05      | 4.975E-05      | 3.383E-05       | 2.301E-05       | 1.564E-05       |
| Cd-Pb-R3 | Cd         | 2.349E-04                   | 1.597E-04      | 1.086E-04      | 7.386E-05      | 5.022E-05      | 3.415E-05      | 2.322E-05      | 1.579E-05      | 1.074E-05      | 7.302E-06       | 4.965E-06       | 3.376E-06       |
|          | Pb         | 1.488E-03                   | 1.012E-03      | 6.883E-04      | 4.680E-04      | 3.182E-04      | 2.164E-04      | 1.472E-04      | 1.001E-04      | 6.805E-05      | 4.627E-05       | 3.146E-05       | 2.140E-05       |
| Cd-Pb-R4 | Cd         | 1.430E-04                   | 9.721E-05      | 6.610E-05      | 4.495E-05      | 3.056E-05      | 2.078E-05      | 1.413E-05      | 9.611E-06      | 6.535E-06      | 4.444E-06       | 3.022E-06       | 2.055E-06       |
|          | Pb         | 1.813E-03                   | 1.233E-03      | 8.381E-04      | 5.699E-04      | 3.876E-04      | 2.635E-04      | 1.792E-04      | 1.219E-04      | 8.287E-05      | 5.635E-05       | 3.832E-05       | 2.606E-05       |
| Cd-Pb-R5 | Cd         | 6.561E-05                   | 4.461E-05      | 3.034E-05      | 2.063E-05      | 1.403E-05      | 9.539E-06      | 6.486E-06      | 4.411E-06      | 2.999E-06      | 2.040E-06       | 1.387E-06       | 9.431E-07       |
|          | Pb         | 2.069E-03                   | 1.407E-03      | 9.566E-04      | 6.505E-04      | 4.423E-04      | 3.008E-04      | 2.045E-04      | 1.391E-04      | 9.458E-05      | 6.431E-05       | 4.373E-05       | 2.974E-05       |

<sup>c</sup> C: The concentration of the mixture components



**Table S4b** The concentration of a single component in the mixture of Cd-Mn

| Rays     | components | C <sub>1</sub> | C <sub>2</sub> | C <sub>3</sub> | C <sub>4</sub> | C <sub>5</sub> | C <sub>6</sub> | C <sub>7</sub> | C <sub>8</sub> | C <sub>9</sub> | C <sub>10</sub> | C <sub>11</sub> | C <sub>12</sub> |
|----------|------------|----------------|----------------|----------------|----------------|----------------|----------------|----------------|----------------|----------------|-----------------|-----------------|-----------------|
| Cd-Mn-R1 | Cd         | 4.829E-04      | 3.284E-04      | 2.233E-04      | 1.518E-04      | 1.032E-04      | 7.021E-05      | 4.774E-05      | 3.246E-05      | 2.208E-05      | 1.501E-05       | 1.021E-05       | 6.941E-06       |
|          | Mn         | 7.030E-04      | 4.780E-04      | 3.251E-04      | 2.210E-04      | 1.503E-04      | 1.022E-04      | 6.950E-05      | 4.726E-05      | 3.214E-05      | 2.185E-05       | 1.486E-05       | 1.010E-05       |
| Cd-Mn-R2 | Cd         | 4.259E-04      | 2.896E-04      | 1.970E-04      | 1.339E-04      | 9.107E-05      | 6.193E-05      | 4.211E-05      | 2.864E-05      | 1.947E-05      | 1.324E-05       | 9.004E-06       | 6.123E-06       |
|          | Mn         | 1.551E-03      | 1.054E-03      | 7.170E-04      | 4.876E-04      | 3.315E-04      | 2.254E-04      | 1.533E-04      | 1.042E-04      | 7.089E-05      | 4.820E-05       | 3.278E-05       | 2.229E-05       |
| Cd-Mn-R3 | Cd         | 3.562E-04      | 2.422E-04      | 1.647E-04      | 1.120E-04      | 7.615E-05      | 5.178E-05      | 3.521E-05      | 2.394E-05      | 1.628E-05      | 1.107E-05       | 7.529E-06       | 5.120E-06       |
|          | Mn         | 2.592E-03      | 1.763E-03      | 1.199E-03      | 8.151E-04      | 5.543E-04      | 3.769E-04      | 2.563E-04      | 1.743E-04      | 1.185E-04      | 8.058E-05       | 5.480E-05       | 3.726E-05       |
| Cd-Mn-R4 | Cd         | 2.682E-04      | 1.824E-04      | 1.240E-04      | 8.434E-05      | 5.735E-05      | 3.900E-05      | 2.652E-05      | 1.803E-05      | 1.226E-05      | 8.339E-06       | 5.670E-06       | 3.856E-06       |
|          | Mn         | 3.904E-03      | 2.654E-03      | 1.805E-03      | 1.227E-03      | 8.346E-04      | 5.675E-04      | 3.859E-04      | 2.624E-04      | 1.785E-04      | 1.213E-04       | 8.252E-05       | 5.611E-05       |
| Cd-Mn-R5 | Cd         | 1.538E-04      | 1.046E-04      | 7.110E-05      | 4.835E-05      | 3.288E-05      | 2.236E-05      | 1.520E-05      | 1.034E-05      | 7.029E-06      | 4.780E-06       | 3.250E-06       | 2.210E-06       |
|          | Mn         | 5.605E-03      | 3.811E-03      | 2.592E-03      | 1.762E-03      | 1.198E-03      | 8.149E-04      | 5.542E-04      | 3.768E-04      | 2.562E-04      | 1.742E-04       | 1.185E-04       | 8.057E-05       |

**Table S4c** The concentration of a single component in the mixture of Pb -Mn

| Rays     | components | C <sub>1</sub> | C <sub>2</sub> | C <sub>3</sub> | C <sub>4</sub> | C <sub>5</sub> | C <sub>6</sub> | C <sub>7</sub> | C <sub>8</sub> | C <sub>9</sub> | C <sub>10</sub> | C <sub>11</sub> | C <sub>12</sub> |
|----------|------------|----------------|----------------|----------------|----------------|----------------|----------------|----------------|----------------|----------------|-----------------|-----------------|-----------------|
| Pb-Mn-R1 | Pb         | 2.076E-03      | 1.411E-03      | 9.598E-04      | 6.526E-04      | 4.438E-04      | 3.018E-04      | 2.052E-04      | 1.395E-04      | 9.489E-05      | 6.453E-05       | 4.388E-05       | 2.984E-05       |
|          | Mn         | 4.768E-04      | 3.242E-04      | 2.205E-04      | 1.499E-04      | 1.019E-04      | 6.932E-05      | 4.714E-05      | 3.205E-05      | 2.180E-05      | 1.482E-05       | 1.008E-05       | 6.854E-06       |
| Pb-Mn-R2 | Pb         | 1.836E-03      | 1.249E-03      | 8.492E-04      | 5.774E-04      | 3.927E-04      | 2.670E-04      | 1.816E-04      | 1.235E-04      | 8.395E-05      | 5.709E-05       | 3.882E-05       | 2.640E-05       |
|          | Mn         | 1.055E-03      | 7.172E-04      | 4.877E-04      | 3.316E-04      | 2.255E-04      | 1.533E-04      | 1.043E-04      | 7.091E-05      | 4.822E-05      | 3.279E-05       | 2.230E-05       | 1.516E-05       |
| Pb-Mn-R3 | Pb         | 1.568E-03      | 1.066E-03      | 7.251E-04      | 4.931E-04      | 3.353E-04      | 2.280E-04      | 1.550E-04      | 1.054E-04      | 7.169E-05      | 4.875E-05       | 3.315E-05       | 2.254E-05       |
|          | Mn         | 1.801E-03      | 1.225E-03      | 8.329E-04      | 5.664E-04      | 3.851E-04      | 2.619E-04      | 1.781E-04      | 1.211E-04      | 8.235E-05      | 5.600E-05       | 3.808E-05       | 2.589E-05       |
| Pb-Mn-R4 | Pb         | 1.242E-03      | 8.445E-04      | 5.742E-04      | 3.905E-04      | 2.655E-04      | 1.806E-04      | 1.228E-04      | 8.349E-05      | 5.677E-05      | 3.861E-05       | 2.625E-05       | 1.785E-05       |
|          | Mn         | 2.854E-03      | 1.941E-03      | 1.320E-03      | 8.974E-04      | 6.102E-04      | 4.149E-04      | 2.822E-04      | 1.919E-04      | 1.305E-04      | 8.872E-05       | 6.033E-05       | 4.102E-05       |
| Pb-Mn-R5 | Pb         | 7.906E-04      | 5.376E-04      | 3.656E-04      | 2.486E-04      | 1.690E-04      | 1.150E-04      | 7.817E-05      | 5.315E-05      | 3.615E-05      | 2.458E-05       | 1.671E-05       | 1.137E-05       |
|          | Mn         | 4.541E-03      | 3.088E-03      | 2.100E-03      | 1.428E-03      | 9.709E-04      | 6.602E-04      | 4.489E-04      | 3.053E-04      | 2.076E-04      | 1.412E-04       | 9.599E-05       | 6.527E-05       |

**Table S5** The concentration of a single component in the mixture of Cd-Pb-Mn

| Rays        | components | C <sub>1</sub> | C <sub>2</sub> | C <sub>3</sub> | C <sub>4</sub> | C <sub>5</sub> | C <sub>6</sub> | C <sub>7</sub> | C <sub>8</sub> | C <sub>9</sub> | C <sub>10</sub> | C <sub>11</sub> | C <sub>12</sub> |
|-------------|------------|----------------|----------------|----------------|----------------|----------------|----------------|----------------|----------------|----------------|-----------------|-----------------|-----------------|
| Cd-Pb-Mn-R1 | Cd         | 3.685E-04      | 2.506E-04      | 1.704E-04      | 1.159E-04      | 7.879E-05      | 5.358E-05      | 3.643E-05      | 2.477E-05      | 1.685E-05      | 1.146E-05       | 7.790E-06       | 5.297E-06       |
|             | Pb         | 2.590E-04      | 1.761E-04      | 1.198E-04      | 8.143E-05      | 5.537E-05      | 3.765E-05      | 2.560E-05      | 1.741E-05      | 1.184E-05      | 8.051E-06       | 5.475E-06       | 3.723E-06       |
|             | Mn         | 2.090E-03      | 1.421E-03      | 9.664E-04      | 6.572E-04      | 4.469E-04      | 3.039E-04      | 2.066E-04      | 1.405E-04      | 9.555E-05      | 6.497E-05       | 4.418E-05       | 3.004E-05       |
| Cd-Pb-Mn-R2 | Cd         | 8.070E-04      | 5.488E-04      | 3.732E-04      | 2.538E-04      | 1.726E-04      | 1.173E-04      | 7.979E-05      | 5.426E-05      | 3.689E-05      | 2.509E-05       | 1.706E-05       | 1.160E-05       |
|             | Pb         | 4.069E-04      | 2.767E-04      | 1.882E-04      | 1.280E-04      | 8.701E-05      | 5.917E-05      | 4.023E-05      | 2.736E-05      | 1.860E-05      | 1.265E-05       | 8.602E-06       | 5.850E-06       |
|             | Mn         | 5.469E-04      | 3.719E-04      | 2.529E-04      | 1.720E-04      | 1.169E-04      | 7.952E-05      | 5.407E-05      | 3.677E-05      | 2.500E-05      | 1.700E-05       | 1.156E-05       | 7.862E-06       |
| Cd-Pb-Mn-R3 | Cd         | 1.045E-03      | 7.104E-04      | 4.830E-04      | 3.285E-04      | 2.234E-04      | 1.519E-04      | 1.033E-04      | 7.023E-05      | 4.776E-05      | 3.247E-05       | 2.208E-05       | 1.502E-05       |
|             | Pb         | 9.795E-05      | 6.660E-05      | 4.529E-05      | 3.080E-05      | 2.094E-05      | 1.424E-05      | 9.684E-06      | 6.585E-06      | 4.478E-06      | 3.045E-06       | 2.070E-06       | 1.408E-06       |
|             | Mn         | 1.918E-03      | 1.304E-03      | 8.870E-04      | 6.031E-04      | 4.101E-04      | 2.789E-04      | 1.896E-04      | 1.290E-04      | 8.769E-05      | 5.963E-05       | 4.055E-05       | 2.757E-05       |
| Cd-Pb-Mn-R4 | Cd         | 1.125E-03      | 7.649E-04      | 5.202E-04      | 3.537E-04      | 2.405E-04      | 1.636E-04      | 1.112E-04      | 7.563E-05      | 5.143E-05      | 3.497E-05       | 2.378E-05       | 1.617E-05       |
|             | Pb         | 8.810E-05      | 5.991E-05      | 4.074E-05      | 2.770E-05      | 1.884E-05      | 1.281E-05      | 8.711E-06      | 5.923E-06      | 4.028E-06      | 2.739E-06       | 1.862E-06       | 1.266E-06       |
|             | Mn         | 9.841E-04      | 6.692E-04      | 4.550E-04      | 3.094E-04      | 2.104E-04      | 1.431E-04      | 9.729E-05      | 6.616E-05      | 4.499E-05      | 3.059E-05       | 2.080E-05       | 1.415E-05       |
| Cd-Pb-Mn-R5 | Cd         | 1.115E-03      | 7.581E-04      | 5.155E-04      | 3.505E-04      | 2.384E-04      | 1.621E-04      | 1.102E-04      | 7.495E-05      | 5.097E-05      | 3.466E-05       | 2.357E-05       | 1.603E-05       |
|             | Pb         | 1.759E-04      | 1.196E-04      | 8.132E-05      | 5.530E-05      | 3.760E-05      | 2.557E-05      | 1.739E-05      | 1.182E-05      | 8.040E-06      | 5.467E-06       | 3.718E-06       | 2.528E-06       |
|             | Mn         | 1.280E-03      | 8.707E-04      | 5.921E-04      | 4.026E-04      | 2.738E-04      | 1.862E-04      | 1.266E-04      | 8.608E-05      | 5.854E-05      | 3.981E-05       | 2.707E-05       | 1.841E-05       |

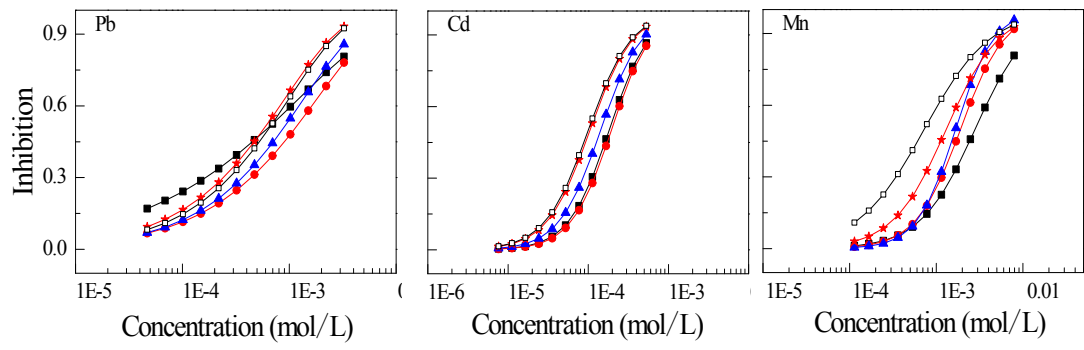

Fig. S1 Concentration-response curves of three heavy metals at different time points for Q67 where ■, ●, ▲, ▼, and □ refer to 0.25, 2, 4, 8 and 12 h.

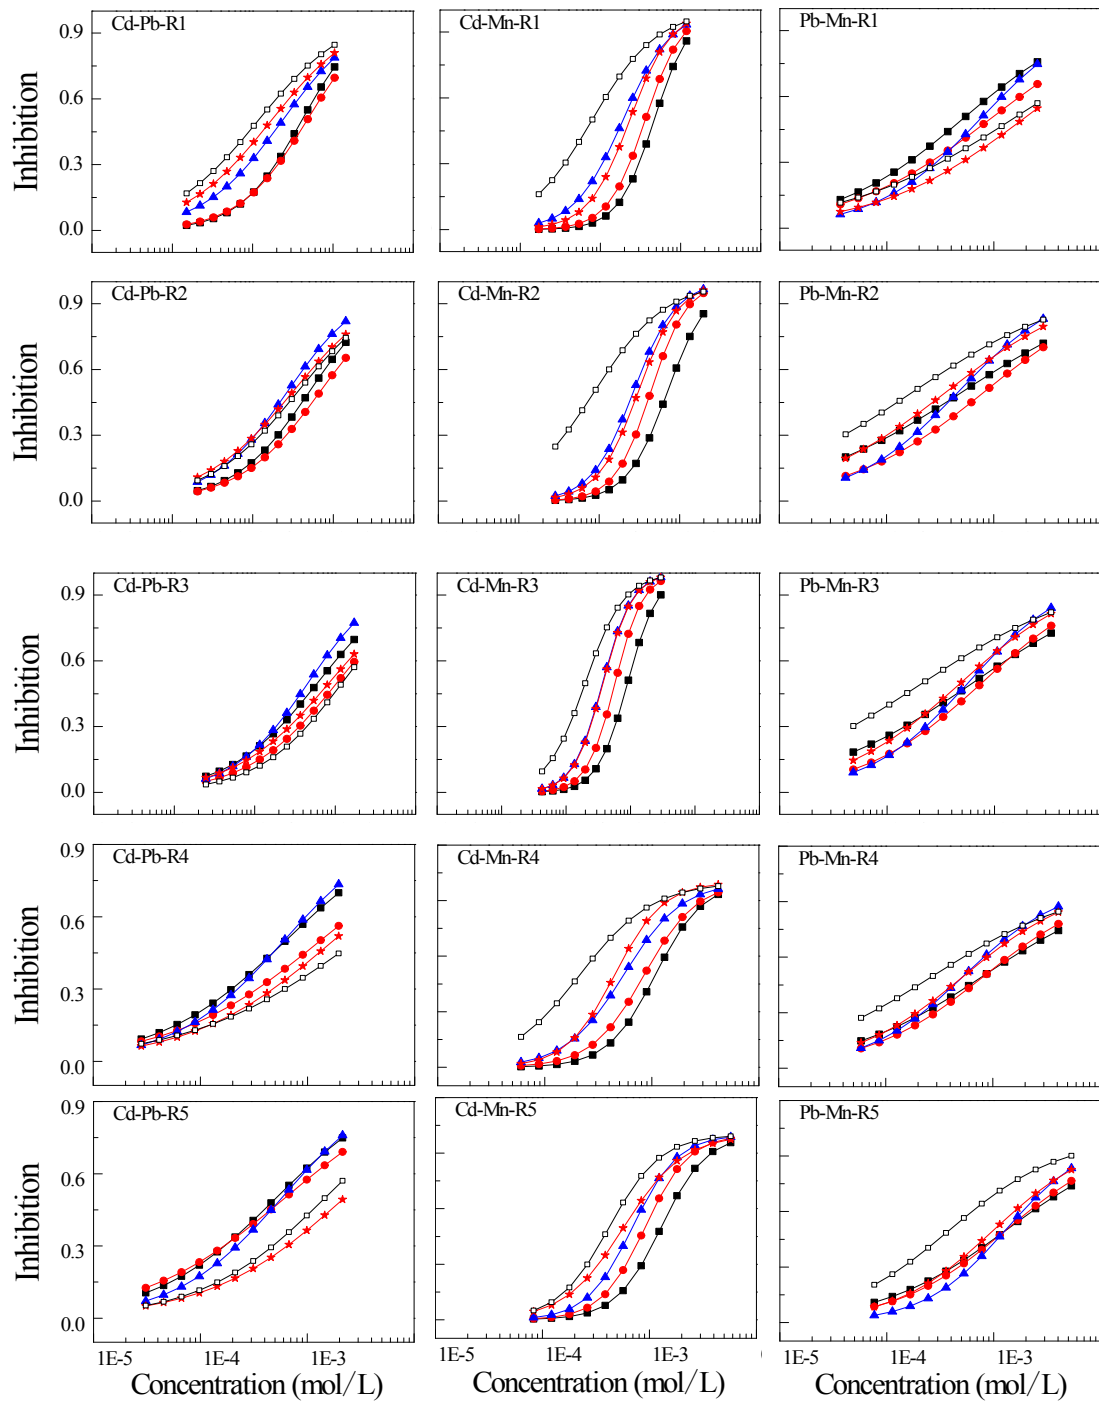

Fig. S2 The concentration-response curves of the three binary mixture systems of three heavy metals on Q67

where ■, ●, ▲, ▼ and □ refer to 0.25, 2, 4, 8 and 12 h.

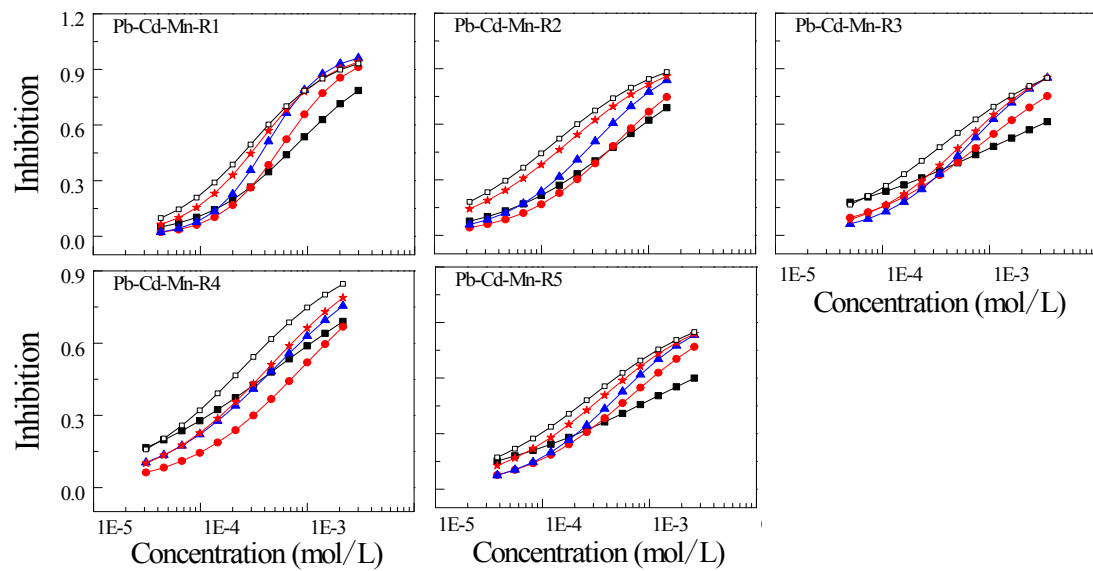

Fig. S3 The concentration-response curves of the ternary mixture systems of three heavy metals on Q67 where

■, ●, ▲, ▼ and □ refer to 0.25, 2, 4, 8 and 12 h.

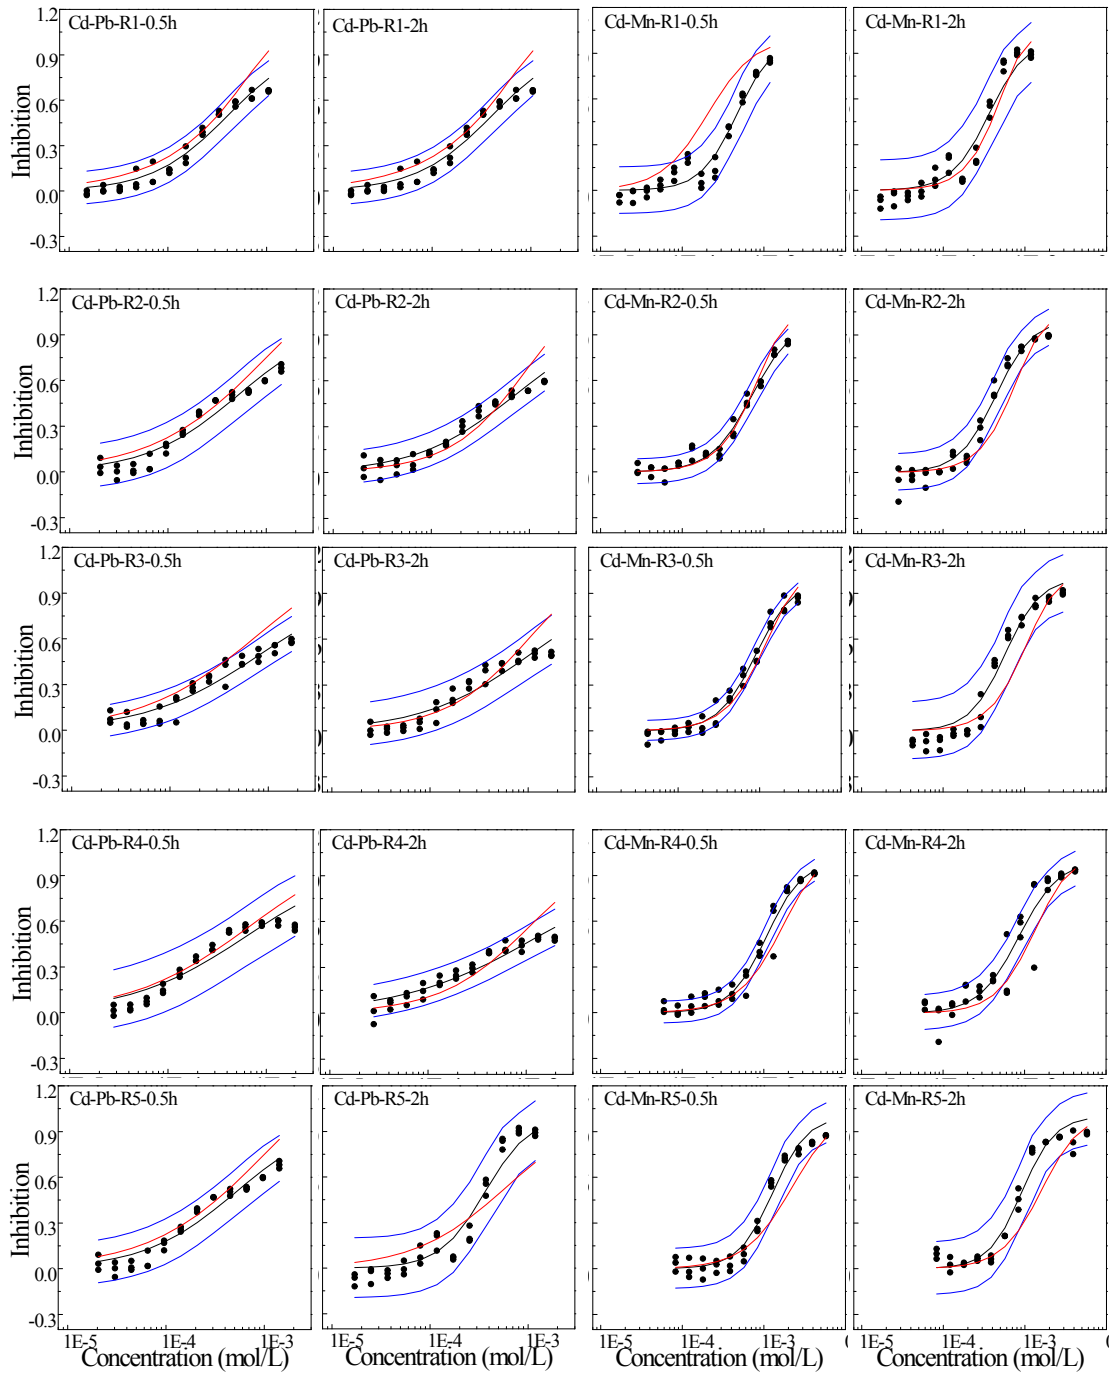

Fig. S4a The concentration-response relationship of ten rays in Cd-Pb and Cd-Mn binary mixture systems towards Q67 in two exposure times of 0.25 and 2 h where the black scatters refer to the experimental points, blue lines to the 95% confidence intervals, black solid lines to the fitted CRCs, and red solid line to the CRCs predicted by CA.

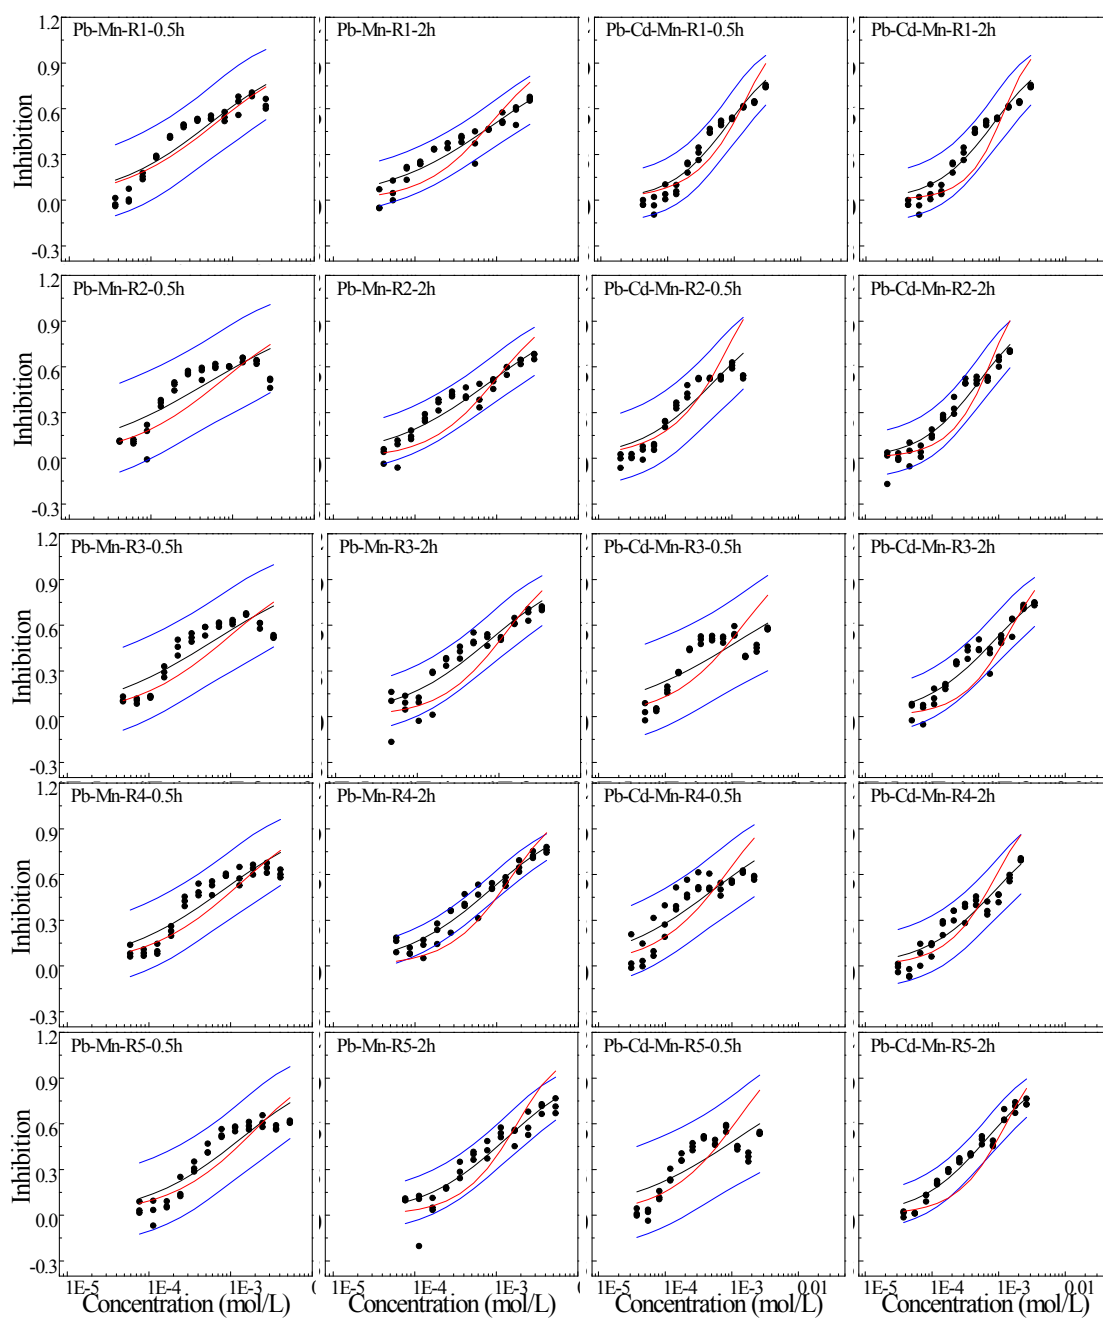

Fig. S4b The concentration-response relationship of ten rays in Pb-Mn binary and Pb-Cd-Mn ternary mixture systems towards Q67 in two exposure times of 0.25 and 2 h where the black scatters refer to the experimental points, blue lines to the 95% confidential intervals, black solid lines to the fitted CRCs, and red solid line to the CRCs predicted by CA.
